# Supplementary material for: Mutagenesis of precursor peptide for the generation of nosiheptide analogues
Source: Royal Society of Chemistry journal article supplement (doi:10.1039/c6ra20302g), 2016-01-01
Supplement: c6ra20302g1.pdf [file c6ra20302g1.pdf]

## Supplementary Information

### Mutagenesis of Precursor Peptide for the Generation of Nosiheptide Analogues

Shuzhen Wang,<sup>†</sup> Xulu Zheng<sup>†</sup>, Qi Pan and Yijun Chen<sup>\*</sup>

*State Key Laboratory of Natural Medicines and Laboratory of Chemical Biology, China*

*Pharmaceutical University, 24 Tongjiaxiang, Nanjing, Jiangsu Province 210009, People's*

*Republic of China. E-mail: yjchen@cpu.edu.cn; Fax: 86-25-83271031; Tel.: 86-25-83271045.*

<sup>†</sup> Shuzhen Wang and Xulu Zheng contributed equally to this work.

## Table of contents

|                                                                                                                   |    |
|-------------------------------------------------------------------------------------------------------------------|----|
| Table S1 H <sup>1</sup> and C <sup>13</sup> NMR chemical shifts of analogue 6 in DMSO-d6 ( $\delta$ in ppm) ..... | 2  |
| Table S2 H <sup>1</sup> and C <sup>13</sup> NMR chemical shifts of analogue 7 in DMSO-d6 ( $\delta$ in ppm) ..... | 3  |
| Table S3 H <sup>1</sup> and C <sup>13</sup> NMR chemical shifts of analogue 8 in DMSO-d6 ( $\delta$ in ppm) ..... | 4  |
| Table S4 Primers used in this study .....                                                                         | 5  |
| Fig. S1 LC-TOF/MS analysis of analogue 6 .....                                                                    | 6  |
| Fig. S2 LC-TOF/MS analysis of analogue 7. ....                                                                    | 6  |
| Fig. S3 LC-TOF/MS analysis of analogue 8. ....                                                                    | 6  |
| Fig. S4 Structure and numbering system used for analogue 6 .....                                                  | 7  |
| Fig. S5 NMR spectra of analogue 6. ....                                                                           | 8  |
| Fig. S6 Structure and numbering system used for analogue 7. ....                                                  | 10 |
| Fig. S7 NMR spectra of analogue 7. ....                                                                           | 11 |
| Fig. S8 Structure and numbering system used for analogue 8. ....                                                  | 13 |
| Fig. S9 NMR spectra of analogue 8. ....                                                                           | 14 |

**Table S1 H<sup>1</sup> and C<sup>13</sup> NMR chemical shifts of analogue 6 in DMSO-d<sub>6</sub> (δ in ppm)**

| Assignment | δ <sub>C</sub> , mult | δ <sub>H</sub> (J in Hz) | Assignment | δ <sub>C</sub> , mult | δ <sub>H</sub> (J in Hz) |
|------------|-----------------------|--------------------------|------------|-----------------------|--------------------------|
| Ind CO     | 181.415               |                          | But 3      | 129.109               | 6.53 (q, 1H)             |
| Glu CO     | 172.647               |                          | Pyr 4      | 126.894               | 6.43 (s, 1H)             |
| Thz(3) 2   | 170.594               |                          | Thz(5) 5   | 126.114               | 8.77 (s, 1H)             |
| Thz(4) 2   | 170.222               |                          | Thz(1) 5   | 125.893               | 8.51 (s, 1H)             |
| Ala CO     | 169.100               |                          | Thz(3) 5   | 125.080               | 8.28 (s, 1H)             |
| Thz(5) 2   | 166.483               |                          | Ind 6      | 124.908               | 7.25 (d, 1H)             |
| Thz(2) 2   | 166.097               |                          | Ind 3a     | 124.848               |                          |
| Dha CO     | 165.099               |                          | Ind 5      | 123.597               | 7.45 (d, 1H)             |
| Thz(1) 2   | 164.650               |                          | Thz(2) 5   | 118.658               | 8.48 (s, 1H)             |
| Thz(3) CO  | 163.471               |                          | Thz(4) 5   | 118.261               | 8.26 (s, 1H)             |
| Thz(2) CO  | 159.825               |                          | Ind 3      | 114.929               |                          |
| Thz(1) CO  | 159.568               |                          | Ind 7      | 103.524               | 7.41 (d, 1H)             |
| Thz(5) CO  | 159.480               |                          | Dha 3      | 66.326                | 6.50E(s) 5.73Z(s)        |
| Thz(4) 4   | 159.233               |                          | Glu 4      | 63.050                | 5.24 (s, 1H)             |
| Pyr 3      | 155.383               |                          | Glu4'      | 49.302                | 5.44 (s, 1H)             |
| Thz(1) 4   | 149.867               |                          | Ind 4'     | 47.587                | 5.70 (t, 1H)             |
| Thz(5) 4   | 148.940               |                          | Cys 2      | 44.634                | 5.99 (m, 1H)             |
| Thz(3) 4   | 148.940               |                          | Glu 3      | 38.944                | 4.06 (d, 2H)             |
| Thz(2) 4   | 147.306               |                          | Cys 3      | 38.666                | 3.93 (d, 2H)             |
| Pyr 6      | 138.776               |                          | Ala 2      | 29.630                | 5.79 (m, 1H)             |
| Ind 7a     | 137.827               |                          | But 4      | 19.481                | 1.73 (d, 3H)             |
| Pyr 2      | 136.522               |                          | Ind 3'     | 13.533                | 3.42 (m, 3H)             |
| Dha 2      | 134.433               |                          | Ala 3      | 11.913                | 3.63 (d, 3H)             |
| Ind 2      | 130.223               |                          |            |                       |                          |
| Pyr 5      | 129.975               |                          |            |                       |                          |
| But 2      | 129.763               |                          |            |                       |                          |
| Ind 4      | 129.447               |                          |            |                       |                          |

Ind NH 10.81 (s, 1H); Dha NH 10.13 (s, 1H); But NH 9.57 (s, 1H); Cys NH 8.09 (s, 1H)

**Table S2 H<sup>1</sup> and C<sup>13</sup> NMR chemical shifts of analogue 7 in DMSO-d<sub>6</sub> (δ in ppm)**

| Assignment | δ <sub>C</sub> , mult | δ <sub>H</sub> (J in Hz) | Assignment | δ <sub>C</sub> , mult | δ <sub>H</sub> (J in Hz) |
|------------|-----------------------|--------------------------|------------|-----------------------|--------------------------|
| Ind CO     | 181.871               |                          | But 3      | 129.160               | 6.48 (q, 1H)             |
| Glu CO     | 172.810               |                          | Pyr 4      | 127.626               | 6.37 (s, 1H)             |
| Thz(3) 2   | 169.793               |                          | Thz(5) 5   | 127.362               | 8.86 (s, 1H)             |
| Thz(4) 2   | 169.221               |                          | Thz(1) 5   | 126.220               | 8.64 (s, 1H)             |
| Ser CO     | 168.690               |                          | Thz(3) 5   | 125.112               | 8.20 (s, 1H)             |
| Thz(5) 2   | 166.582               |                          | Ind 6      | 124.958               | 7.25 (d, 1H)             |
| Thz(2) 2   | 165.959               |                          | Ind 3a     | 124.852               |                          |
| Dha CO     | 165.054               |                          | Ind 5      | 124.410               | 7.56 (d, 1H)             |
| Thz(1) 2   | 160.400               |                          | Thz(2) 5   | 123.325               | 8.60 (s, 1H)             |
| Thz(3) CO  | 159.999               |                          | Thz(4) 5   | 120.181               | 8.11 (s, 1H)             |
| Thz(2) CO  | 159.758               |                          | Ind 3      | 118.680               |                          |
| Thz(1) CO  | 158.451               |                          | Ind 7      | 107.039               | 7.80 (d, 1H)             |
| Thz(5) CO  | 157.958               |                          | Dha 3      | 103.608               | 6.46E(s) 5.76Z(s)        |
| Thz(4) 4   | 157.713               |                          | Glu 4      | 66.565                | 5.52 (t, 1H)             |
| Pyr 3      | 150.518               |                          | Ser 3      | 65.935                | 5.67 (s, 1H)             |
| Thz(1) 4   | 149.839               |                          | Ind 4'     | 63.227                | 5.48 (m, 1H)             |
| Thz(5) 4   | 149.713               |                          | Ser 2      | 54.007                | 5.50 (m, 1H)             |
| Thz(3) 4   | 149.369               |                          | Cys 2      | 48.929                | 4.05 (d, 1H)             |
| Thz(2) 4   | 148.036               |                          | Glu 2      | 44.791                | 4.02 (d, 1H)             |
| Pyr 6      | 140.978               |                          | Glu 3      | 28.903                | 3.49 (m, 2H)             |
| Ind 7a     | 137.585               |                          | Cys 3      | 28.932                | 3.41 (m, 2H)             |
| Pyr 2      | 135.609               |                          | But 4l     | 13.336                | 1.78 (d, 3H)             |
| Dha 2      | 134.358               |                          | Ind 3'     | 12.637                | 2.73 (s, 3H)             |
| Ind 2      | 130.683               |                          |            |                       |                          |
| Pyr 5      | 129.963               |                          |            |                       |                          |
| But 2      | 129.798               |                          |            |                       |                          |
| Ind 4      | 129.607               |                          |            |                       |                          |

Ind NH 11.29 (s, 1H); Dha NH 10.12 (s, 1H); But NH 9.70 (s, 1H); Cys NH 8.89 (s, 1H)

**Table S3 H<sup>1</sup> and C<sup>13</sup> NMR chemical shifts of analogue 8 in DMSO-d<sub>6</sub> (δ in ppm)**

| Assignment | δ <sub>C</sub> , mult | δ <sub>H</sub> (J in Hz) | Assignment | δ <sub>C</sub> , mult | δ <sub>H</sub> (J in Hz) |
|------------|-----------------------|--------------------------|------------|-----------------------|--------------------------|
| Ind CO     | 181.895               |                          | But 3      | 127.101               | 6.44 (q, 1H)             |
| Glu CO     | 172.994               |                          | Pyr 4      | 126.506               | 6.35 (s, 1H)             |
| Thz(3) 2   | 170.014               |                          | Thz(5) 5   | 126.329               | 8.78 (s, 1H)             |
| Thz(4) 2   | 169.594               |                          | Thz(1) 5   | 125.077               | 8.57 (s, 1H)             |
| Thz(5) 2   | 167.321               |                          | Thz(3) 5   | 124.841               | 8.46 (s, 1H)             |
| Val CO     | 166.928               |                          | Ind 6      | 123.442               | 7.19 (s, 1H)             |
| Thz(2) 2   | 166.686               |                          | Ind 3a     | 120.036               |                          |
| Dha CO     | 165.060               |                          | Ind 5      | 117.587               | 7.57 (d, 1H)             |
| Thz(1) 2   | 164.004               |                          | Thz(2) 5   | 115.114               | 8.46 (s, 1H)             |
| Thz(3) CO  | 163.183               |                          | Thz(4) 5   | 103.824               | 8.20 (s, 1H)             |
| Thz(2) CO  | 159.674               |                          | Ind 3      | 99.766                |                          |
| Thz(1) CO  | 159.129               |                          | Ind 7      | 66.359                | 7.68 (d, 1H)             |
| Thz(5) CO  | 158.513               |                          | Dha 3      | 65.810                | 6.35E(s) 5.78Z(s)        |
| Thz(4) 4   | 153.810               |                          | Glu 4      | 56.599                | 5.60 (t, 1H)             |
| Pyr 3      | 153.037               |                          | Ind 4'     | 49.910                | 5.78 (s, 1H)             |
| Thz(1) 4   | 150.368               |                          | Cys 2      | 45.117                | 6.04 (m, 1H)             |
| Thz(5) 4   | 149.605               |                          | Glu 2      | 40.344                | 5.86 (m, 1H)             |
| Thz(3) 4   | 148.779               |                          | Glu 3      | 40.066                | 4.17 (m, 2H)             |
| Thz(2) 4   | 147.621               |                          | Cys 3      | 29.730                | 3.70 (d, 2H)             |
| Pyr 6      | 138.112               |                          | Val 2      | 28.943                | 5.08 (d, 1H)             |
| Ind 7a     | 135.266               |                          | But 4      | 18.477                | 1.70 (d, 3H)             |
| Pyr 2      | 134.419               |                          | Ind 3'     | 12.644                | 2.30 (m, 3H)             |
| Dha 2      | 130.447               |                          | Val 4      | 13.361                | 1.23 (m, 3H)             |
| Ind 2      | 130.054               |                          | Val 4'     | 11.657                | 1.13 (m, 3H)             |
| Pyr 5      | 129.927               |                          |            |                       |                          |
| But 2      | 129.648               |                          |            |                       |                          |
| Ind 4      | 129.020               |                          |            |                       |                          |

Ind NH 11.10 (s, 1H); Dha NH 10.05 (s, 1H); But NH 9.07 (s, 1H)

**Table S4 Primers used in this study**

| <b>Primer Name</b> | <b>Primer Sequence (5'-3')</b>          |
|--------------------|-----------------------------------------|
| nosM-hF            | <u>GGATCC</u> ACCAGGCTCACCAGCTCGGCGGAGA |
| nosM-hR            | AAGCTT <u>TCCTCGCGGGG</u> GATGCCGTGAACA |
| 1001AF             | CACCCAGCCCTGAACCACCTCCACG               |
| 1001AR             | GGATGGCCTGGACCCAGTCGCAGAACG             |
| primer C2S-A       | GCACTCGCAGGTGGTCGACGAGGCCGACA           |
| primer C2S-B       | TGTCGGCCTCGTCGACCACCTGCGAGTGC           |
| primer C5S-A       | AGCACTCCGAGGTGGTGCACGAGGCCGACA          |
| primer C5S-B       | TGTCGGCCTCGTGCACCACCTCGGAGTGTCT         |
| primer C7S-A       | CAGGAGGAGCAGGAACAGCAGACTCGCAG           |
| primer C7S-B       | CTGCGAGTCGTGCTGTTCTCTCTCTCTG            |
| primer C9S-A       | CAGGAGGAGCAGGAGGAGCAGCACTCGCAG          |
| primer C9S-B       | CTGCGAGTGTCTCTCTCTCTCTCTCTG             |
| primer C11S-A      | TCCATCAGGAGGACGAGGAACAGCAGCACT          |
| primer C11S-B      | AGTGCTGCTGTTCTCTCTCTCTGATGGA            |
| T3A-A              | ACTCGCAGGTGGCGCACGAGGCCGACATGAC         |
| T3A-B              | GTCATGTCGGCCTCGTGCGCCACCTGCGAGT         |
| T3S-A              | CAGCACTCGCAGGTGGAGCACGAGGCCGACA         |
| T3S-B              | TGTCGGCCTCGTGCTCCACCTGCGAGTGTCTG        |
| T3V-A              | CAGCACTCGCAGGTGACGCACGAGGCCGACA         |
| T3V-B              | TGTCGGCCTCGTGCGTACCTTGCGAGTGTCTG        |
| T3D-A              | CGCAGGTGTGCACGAGGCCGACATGACCTT          |
| T3D-B              | TGTCGGCCTCGTGCACACCTGCGAGTGTCTG         |
| T3K-A              | CAGCACTCGCAGGTCTTGCACGAGGCCGACA         |
| T3K-B              | TGTCGGCCTCGTGCAAGACCTGCGAGTGTCTG        |

Underlined letters were restriction sites for Hind III (AAGCTT) and BamH I (GGATCC).

**Fig. S1** LC-TOF/MS analysis of analogue 6

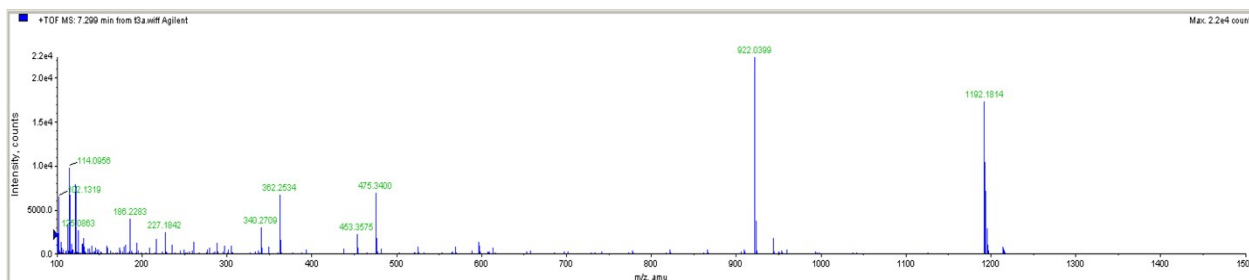

**Fig. S2** LC-TOF/MS analysis of analogue 7.

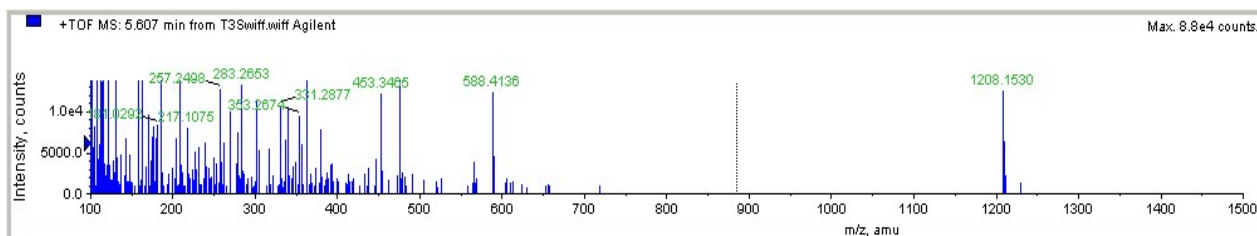

**Fig. S3** LC-TOF/MS analysis of analogue 8.

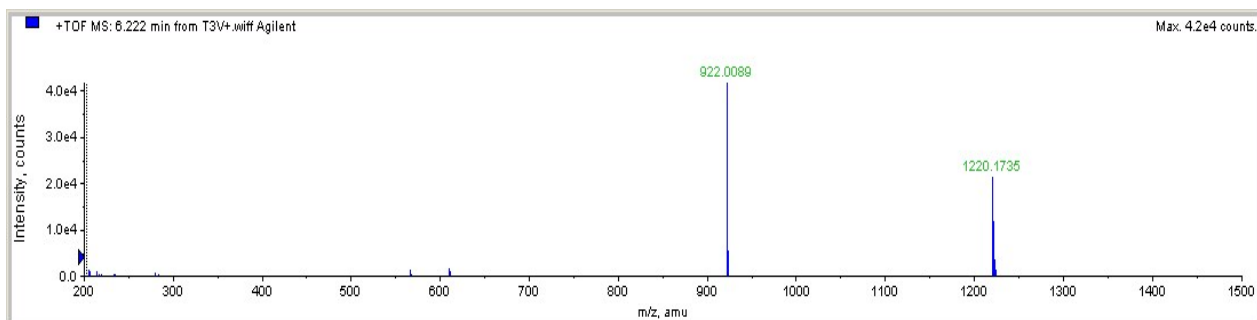

Fig. S4 Structure and numbering system used for analogue 6

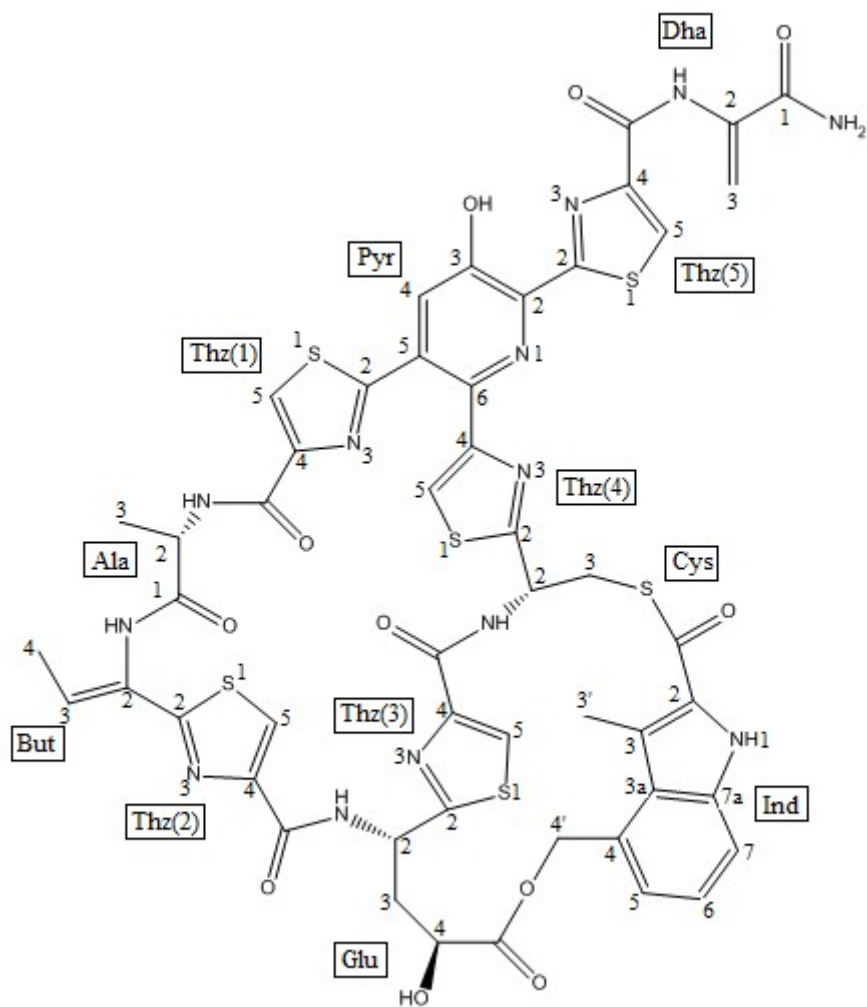



Fig. S5 NMR spectra of analogue 6. (A)  $^1\text{H}$ NMR (303 K, DMSO-d<sub>6</sub>). (B)  $^{13}\text{C}$ NMR (303 K, DMSO-d<sub>6</sub>).

A

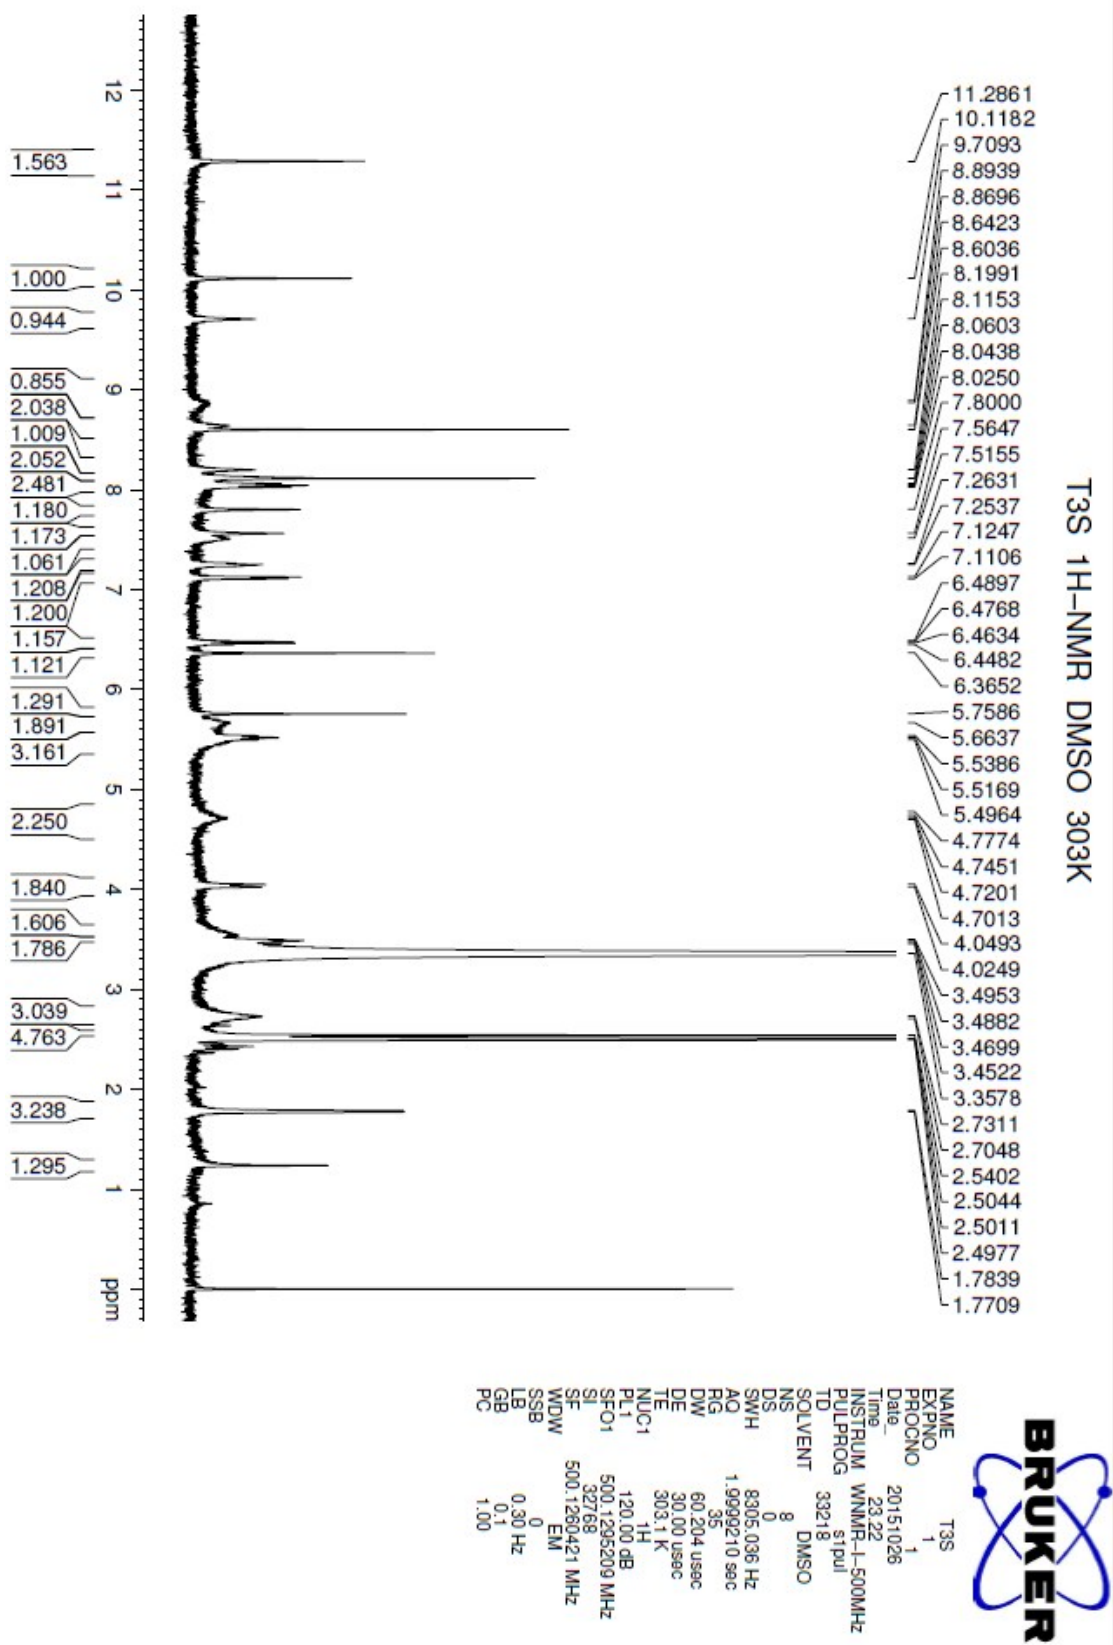

T3A C13-NMR DMSO-d6 303K AV-300

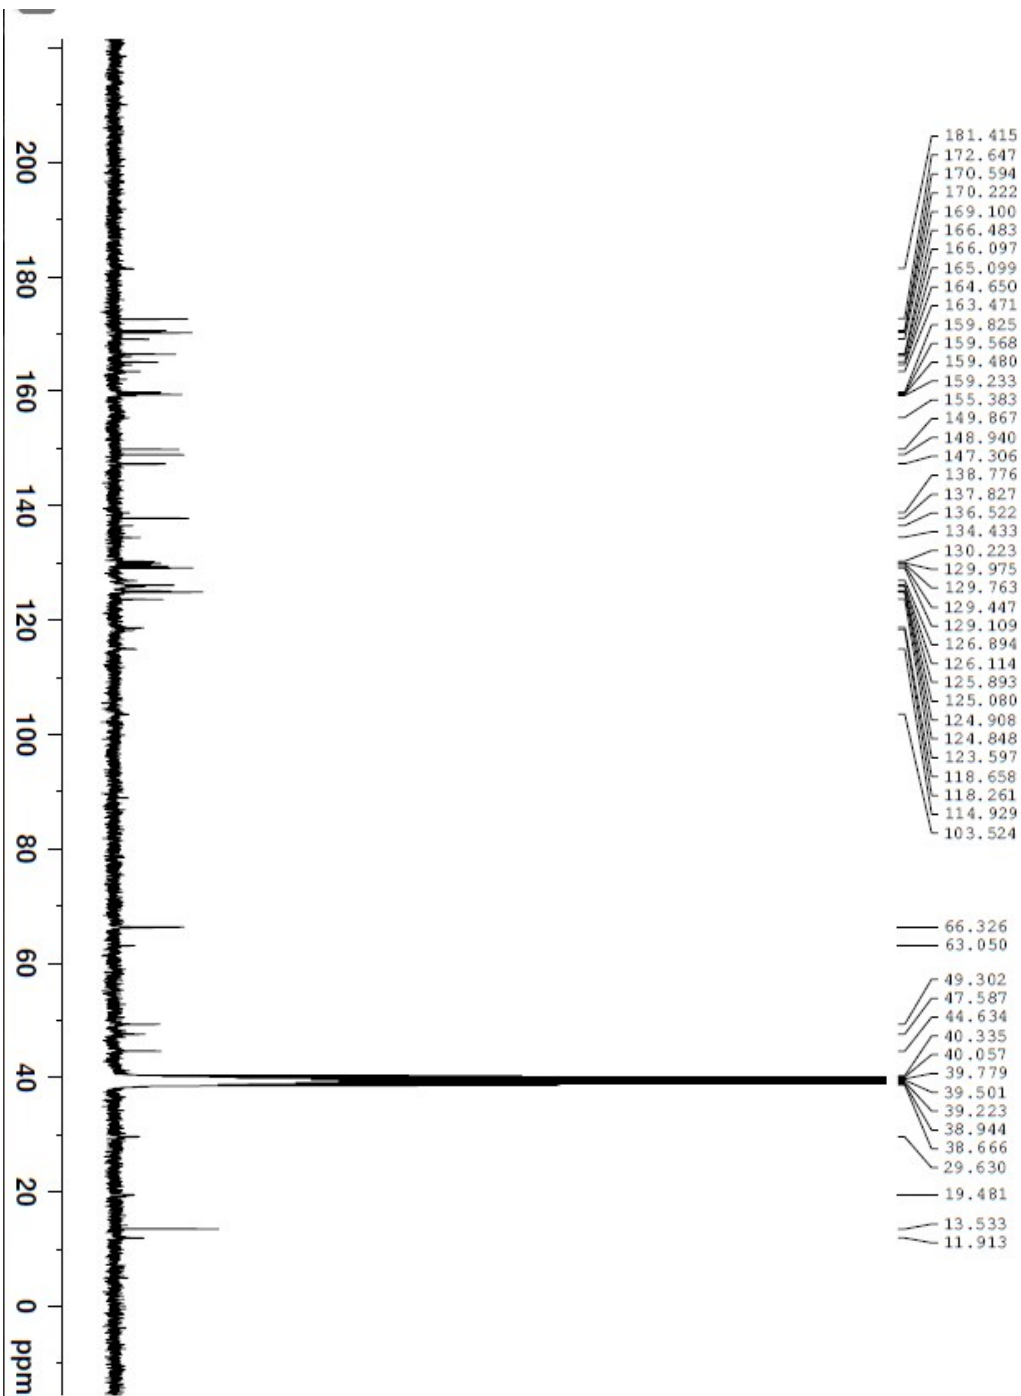

```

NAME          cpyu
EXPNO         1012
PROCNO        1
Date_         20151030
Time          5.21
INSTRUM       av300
PROBHD        5 mm PH0NP Swi
PULPROG       zgpg
TD             32768
SOLVENT       DMSO
NS             16339
DS             8
SWH            19607.844 Hz
FIDRES        0.598384 Hz
AQ             0.8356340 sec
RG             102400
DW             25.500 use
DE             6.00 use
TE             300.0 K
D1             1.20000005 sec
d11            0.030000000 sec

----- CHANNEL F1 -----
NUC1           13C
P1             6.20 use
PL1            -5.00 dB
SFO1           75.4760204 MHz

----- CHANNEL F2 -----
CPDPRG2       waltz16
NUC2           1H
PCPD2         80.00 use
PL2            -2.00 dB
PL12          18.00 dB
SFO2          300.1312005 MHz
SI             32768
SF             75.467882 MHz
WDW            EM
SSB            0
LB             1.00 Hz
GB             0
PC             1.00
  
```

Fig. S6 Structure and numbering system used for analogue 7.

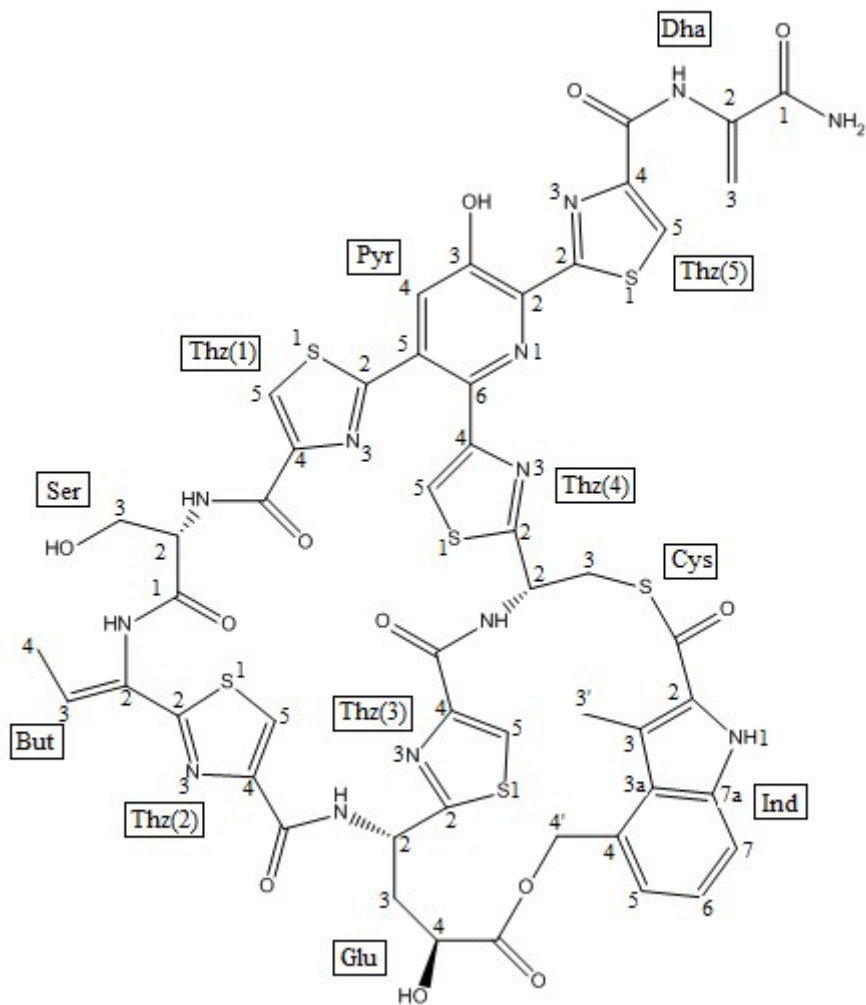

**Fig. S7** NMR spectra of analogue 7. (A)  $H^1$ NMR (303 K, DMSO-d6). (B)  $C^{13}$ NMR (303 K, DMSO-d6).

A

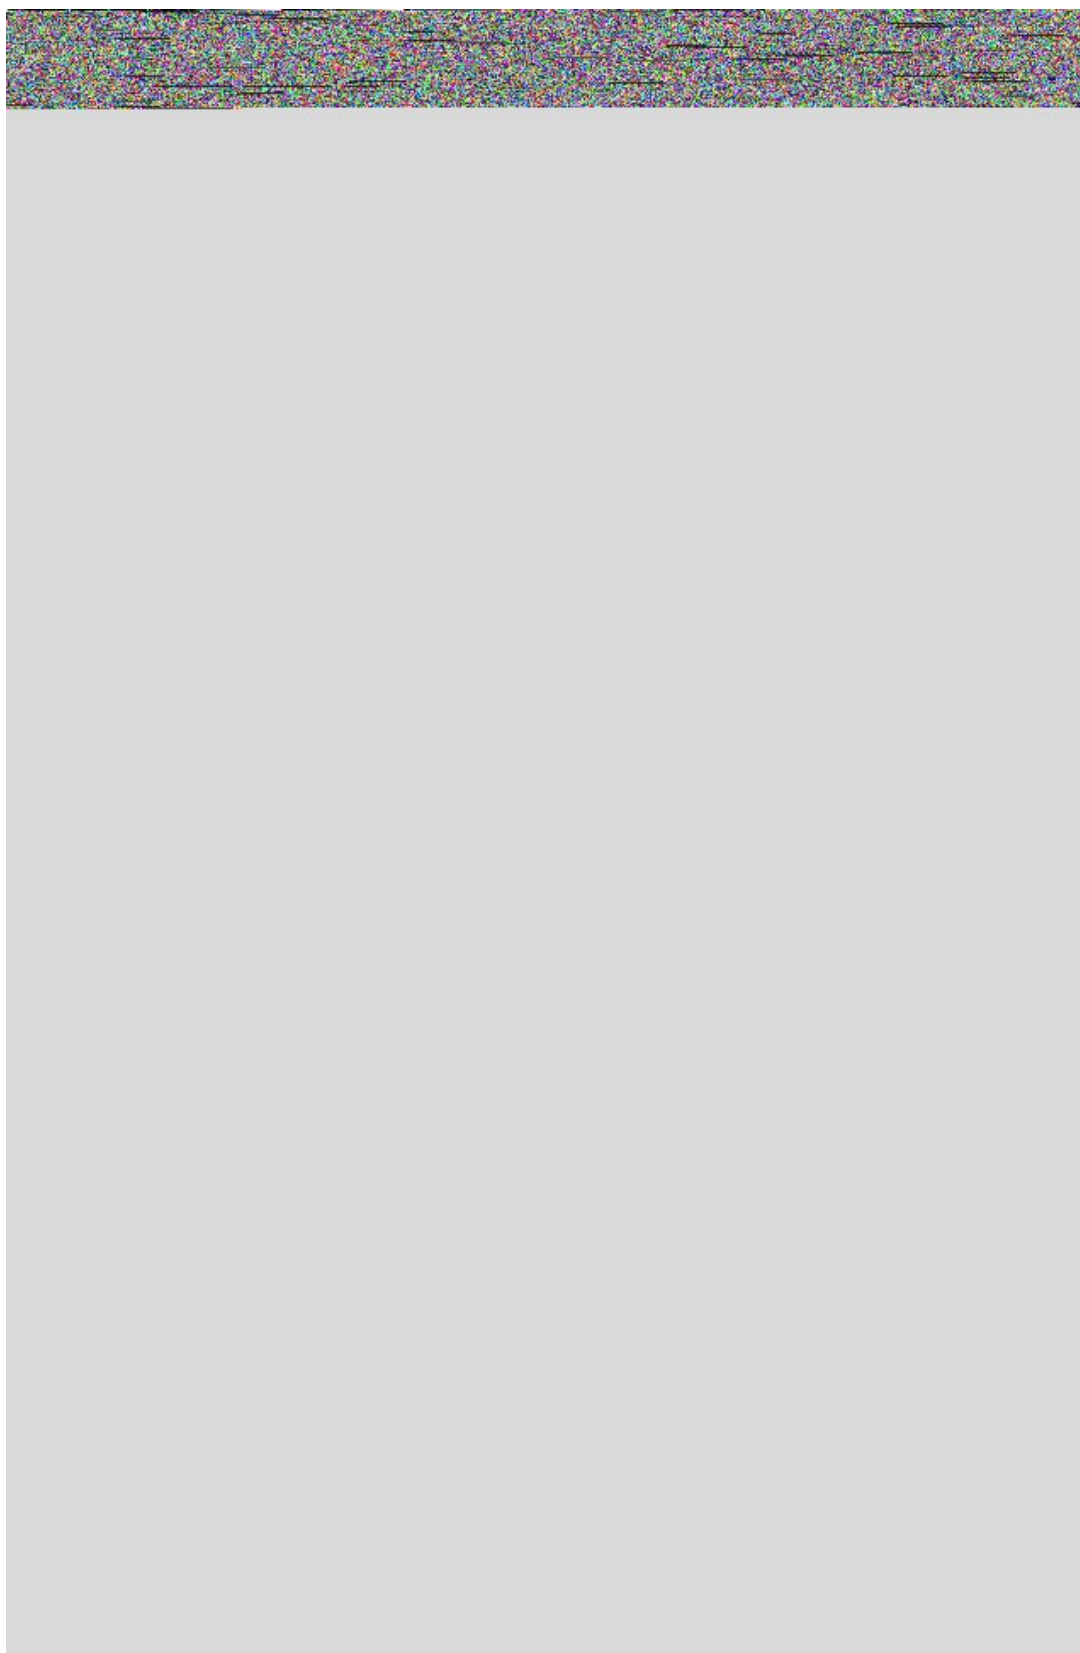

B

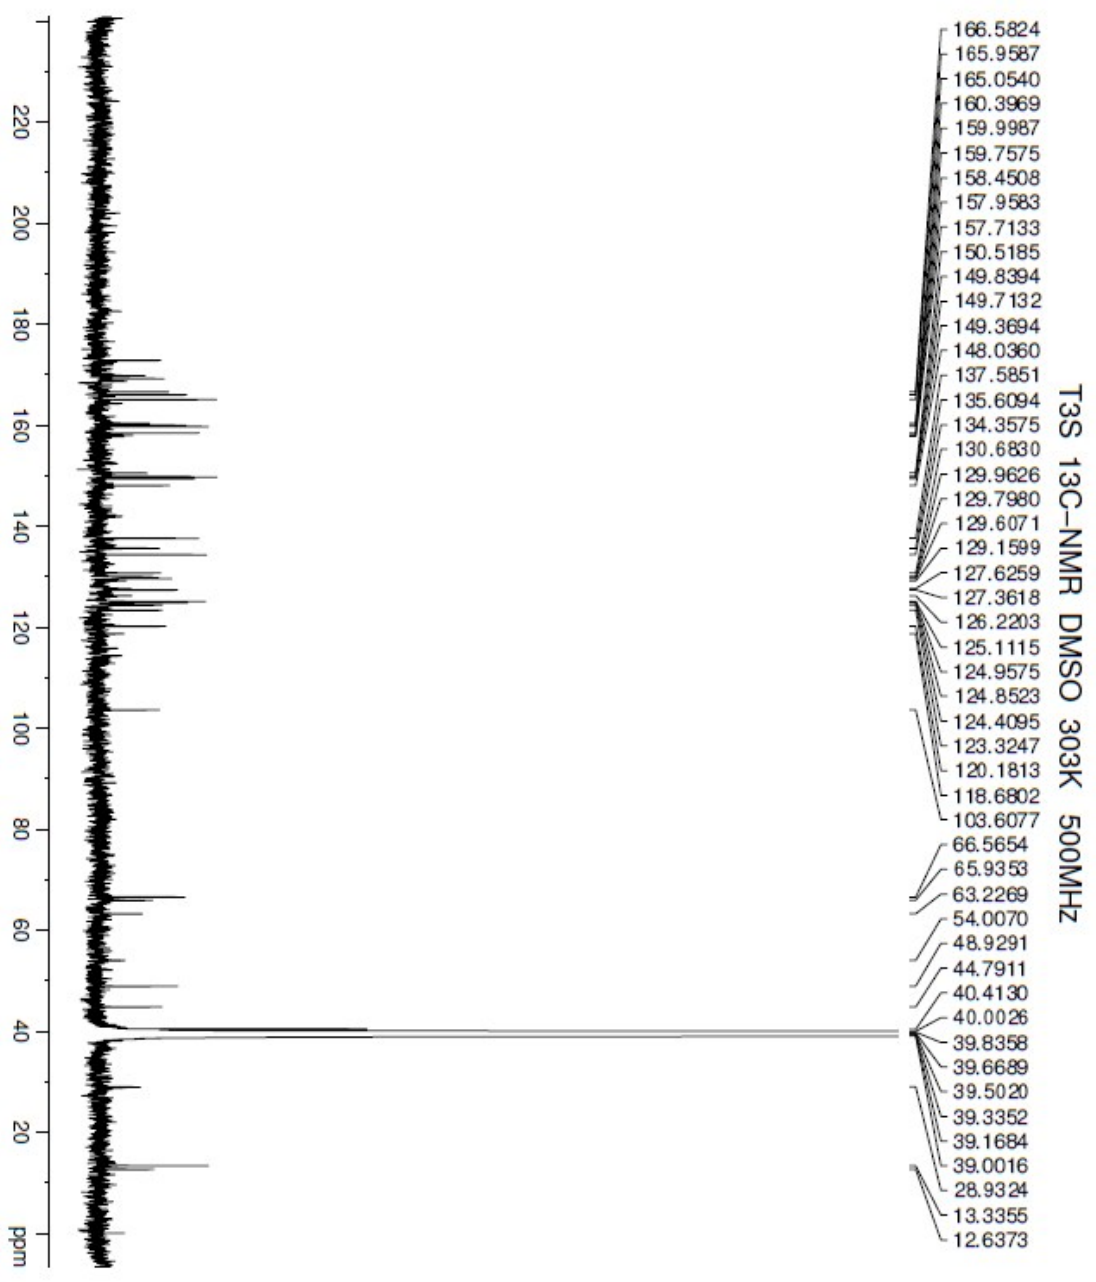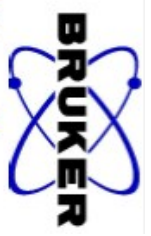

```

NAME      T3S
EXPNO     12
PROCNO    1
Date_     20151107
Time      2.17
INSTRUM   WNMN1-500MHz
PULPROG   s1pul
TD         62226
SOLVENT   DMSO
NS         14207
DS         0
SINH      31123.578 Hz
AQ         0.9997101 sec
RG         35
DE         16.065 usec
TE         303.1 K
NUC1      13C
PL1        120.00 dB
SFO1       125.7715699 MHz
SI         32758
SF         125.7412975 MHz
WDW        EM
SSB        0
LB         3.00 Hz
GB         0.1
PC         1.00
  
```

Fig. S8 Structure and numbering system used for analogue 8.

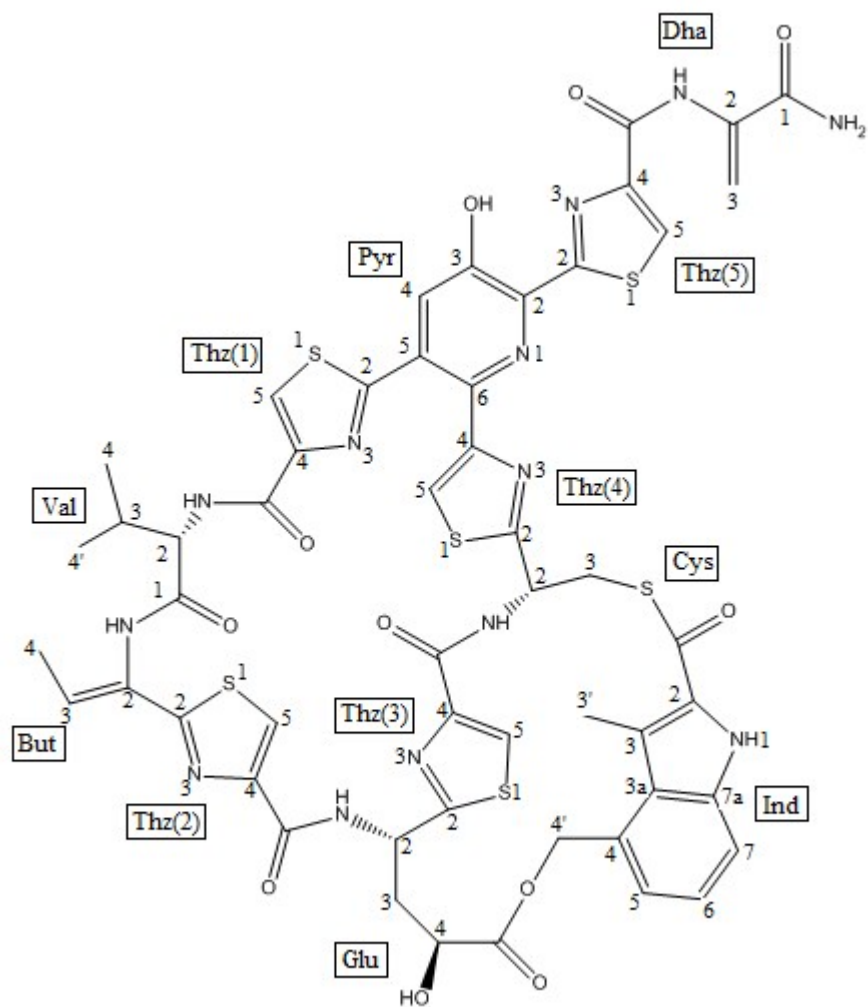

Fig. S9 NMR spectra of analogue 8. (A)  $^1\text{H}$ NMR (300 K, DMSO- $d_6$ ). (B)  $^{13}\text{C}$ NMR (300 K, DMSO- $d_6$ ).

A

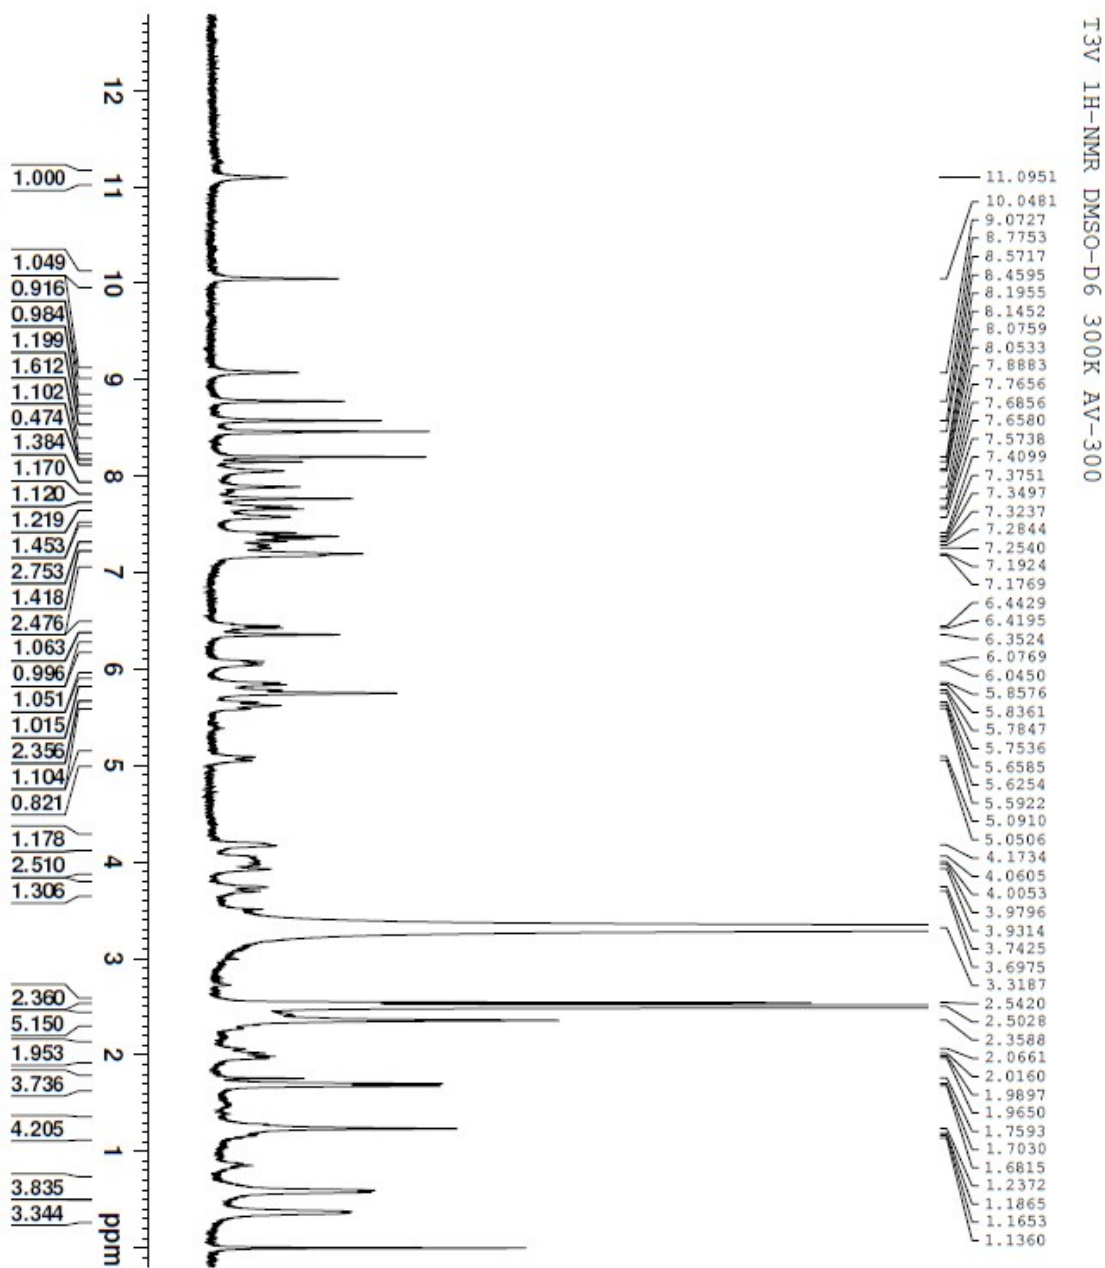

```

NAME          CD1307
EXPNO         19
PROCNO        1
Date_         20150729
Time          13.43
INSTRUM       AV300
PROBHD        5 mm PFGNP SMI
PULPROG       zg30
TD            32768
SOLVENT       DMSO
NS            41
DS            0
SFR          5995.204 Hz
FIDRES        0.182959 Hz
AQ            2.7329011 sec
RG            32
RG2           32
DM            83.400 usec
DE            6.00 usec
TE            298.0 K
D1            1.000000000 sec

----- CHANNEL f1 -----
NUC1          1H
P1            5.65 usec
PL1          -1.00 dB
SFO1         300.1324010 MHz
SI           32768
SF           300.1299977 MHz
WDW          EM
SSB          0
LB           0.20 Hz
GB           0
PC           1.00
    
```

T3V 13C-NMR DMSO-D6 300K AV-300

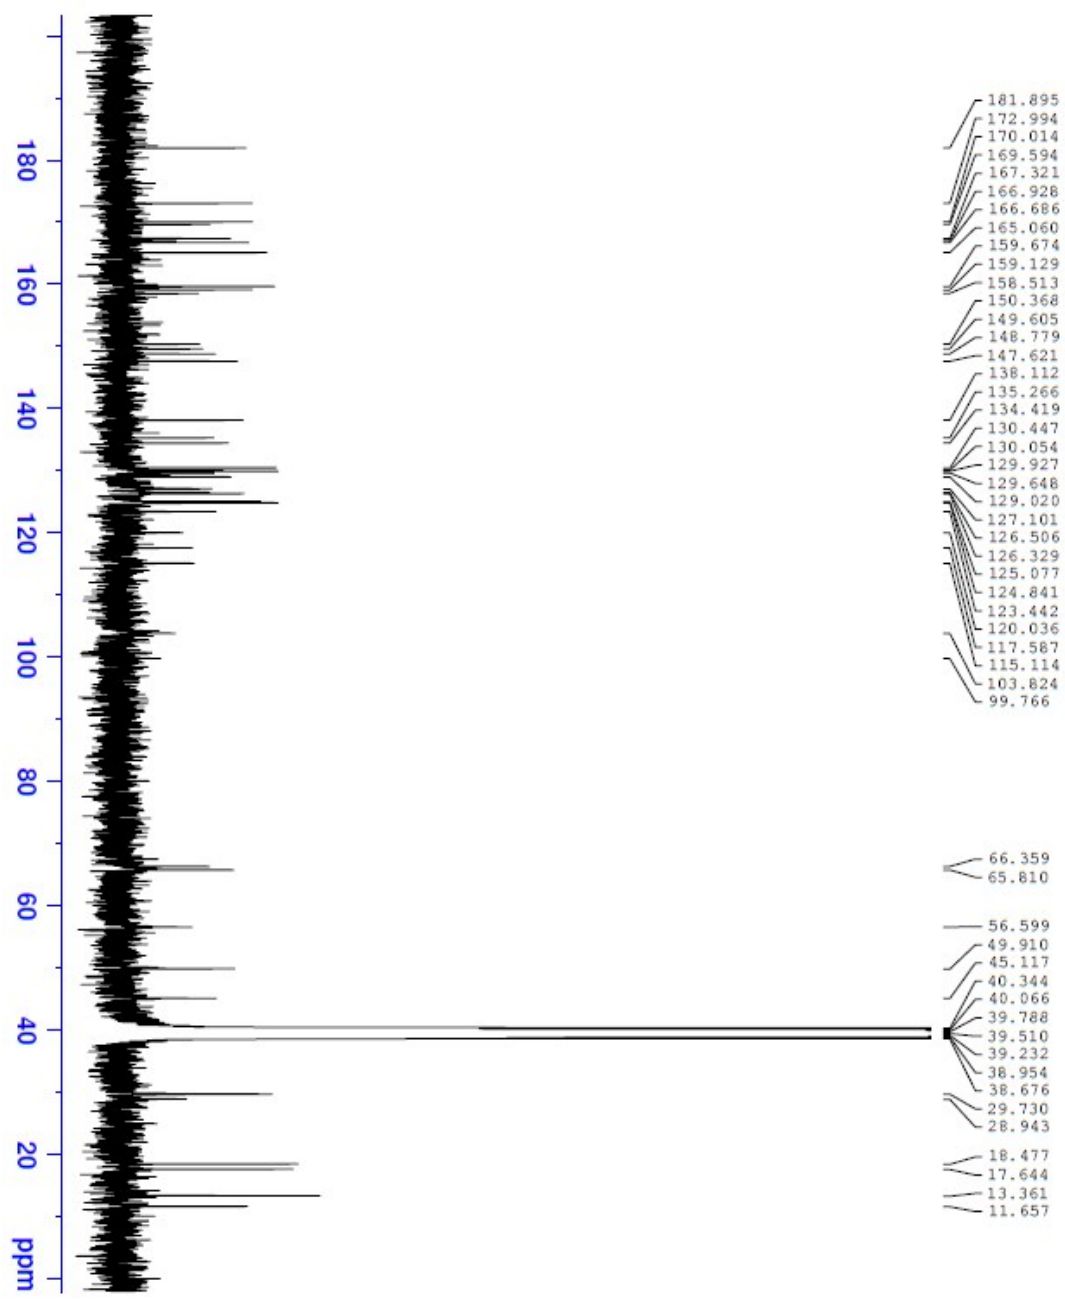

```

NAME          cdj307
EXPNO         20
PROCNO        1
Date_         20150729
Time         5.40
INSTRUM       AV300
PROBHD        5 mm P/QNP SW1
PULPROG       zgpg
TD            32768
SOLVENT       CDCl3
NS           15135
DS           0
SMH          18115.941 Hz
FIDRES       0.552855 Hz
AQ           0.9044468 sec
RG           102400
BW           27.600 usec
DE           6.00 usec
TE           300.2 K
D1           1.00000000 sec
d11          0.03000000 sec

----- CHANNEL F1 -----
NUC1          13C
P1           6.20 usec
PL1          -5.00 dB
SFO1         75.4763978 MHz

----- CHANNEL F2 -----
CPDPRG2      waltz16
NUC2          1H
PCPD2        80.00 usec
PL2          -2.00 dB
PL12         18.00 dB
SFO2         300.1312005 MHz
SI           32768
SF           75.4677864 MHz
WDW          EM
SSB          0
LB           1.00 Hz
GB           0
PC           1.00
  
```

B
